# Supplementary material
Source: publisher figshare collection journal article supplement (https://gsajournals.figshare.com/ndownloader/files/11300189)
Supplement: Supplementary file 1 [file 11300189]

## Sheet: Line Means
DGRP Line	Viability (%)		Development time (days)		Locomotion (s)
					Females		Males
	ETOH Food	Regular Food	ETOH Food	Regular Food	Regular Food	ETOH food	Regular Food	ETOH food
208	18	82	9.8	9.37173	32.225	19.075	33.225	17.775
301	18	39	9.88136	9.77692	31.225	21.5128	33.15	25.15
303	15	42	9.29762	8.78313	23.05	17.575	23.9	17.975
304	0	33	8.9	9.87681	12.3704	17.45	12.56	17.825
306	24	56	9.40426	9.19697	25.6	15.475	26.775	18.05
307	22	48	9.23	8.73171	18.65	11.325	16.35	12.025
313	13	52	9.79747	9.39394	42.275	22.025	41.975	24.75
315	16	38	9.25	9.03614	28.025	18.125	28.25	16.55
324	22	44	9.3	8.46847	31.875	21.15	34.4	21.2051
332	18	34	10.2619	9.09155	12.4	11.975	12.7	9.05
357	48	68	10.0083	9.89674	40.325	22.9	40.35	22.5385
358	4	46	9.8913	8.40458	41.7	20.95	41.8	22.95
360	18	50	9.89474	9.82443	25.925	17.125	21.825	16.7
362	22	84	9.84722	9.34951	18.575	21.425	19.1	23.5
365	56	80	9.97959	9.1044	33.225	20.2	34.225	17.95
375	25	37	9.64198	8.95652	14.95	21.3333	14.075	22.475
377	22	35	9.67568	9.70796	16.725	19.1	17.4	16.95
379	34	60	9.76699	9.77632	26.875	19.925	23.3	15.0769
391	4	32	9.66667	9.52222	28	19.875	26.4	18.35
399	65	84	10.5081	8.86957	34.875	22.2	31.95	23.3
427	29	46	9.9633	9.48182	28.4	20.15	29.925	21.925
437	10	76	9.36111	9.49004	16.85	17.35	17.525	17.875
486	2	50	9.30303	9.08696	26.65	19.275	25.4	16.8
517	3	76	9.35484	9.64407	17.55	18.125	15.2	16.85
555	32	48	10.3	9.27559	19.775	18.25	16.1	16.1795
639	1	14	9.91667	8.95238	21.025	16.825	20.2	16.275
705	36	50	10.0853	9.11486	36.425	22.2	36.9	21.641
707	24	40	9.52756	8.68627	37.325	26.8	41.175	24.925
712	59	74	10.3224	8.77315	22.95	23.45	24.225	23.675
714	6	37	9.74286	8.97761	39.65	21.25	35.05	22.4
730	0	28	11.75	10.3293	16.475	18.1	16.075	15.475
732	6	56	11.375	9.89583	26.525	24.45	25.65	24.9
765	55	52	10.2538	8.87097	36.125	20	35.05	18.5385
774	82	88	10.1796	9.15741	42.5	21.875	40.8	23.475
786	20	66	9.9403	9.35678	25.8	15.95	26.65	14.025
799	7	42	10.0843	9.12264	32.5	17.1	35.3	16.825
820	54	52	10.2308	9.43333	23.825	17.225	23.325	19.6
852	16	35	8.66279	8.69118	42.6	25.375	42.775	23.25
21	6	34	10.4211	9.90361
26	2	43	9.41667	8.16807
28	19	50	10.0986	9.1976
31	12	58	9.54545	8.90875
32	16	52	9.92308	8.99275
38	50	52	9.22901	8.65909
40	30	38	10.2179	9.9802
41	2	55	10.2558	9.1697
42	4	22	10.2273	10.3766
45	4	85	9.88462	9.24206
48	4	15	8.28571	8.80645
49	52	68	10.4786	9.44886
57	6	65	10.36	8.62827
59	36	78	10.2458	9.02604
69	13	22	10.1176	9.87671
73	16	68	10.8772	9.51678
75	50	80	10.1942	9.30208
83	10	43	10.9388	10.3082
85	10	24	9.41935	9.19231
88	16	74	9.38636	9.42353
91	2	24	10.2	9.15517
93	0	65	9.33333	8.96757
100	8	76	10.3832	8.7807
101	11	42	9.37838	9.77876
105	9	44	8.93333	9.1405
109	40	44	9.21978	8.92857
129	6	40	10.75	9.5
136	6	36	9	8.62626
138	3	26	9.91304	9.05556
142	9	15	8.93023	8.8806
149	4	32	11.3143	9.67442
153	22	22	9.88571	10.2885
158	22	40	9.69841	9.47573
161	0	60	8.375	9.29167
176	10	32	9.925	9.83696
177	6	58	9.87179	9.06452
181	19	75	9.59524	9.40686
189	0	16	10.5	9.29545
195	55	70	10.3662	9.44099
217	21	42	9.88636	9.07527
223	6	26	9.72	9.38571
227	12	24	10.2	8.85106
228	4	69	9.35433	9
229	42	64	10.3053	9.17683
233*	0	18	n/a	10.5102
235	3	28	10.1905	9.85321
237	34	53	10.4554	8.98601
239	12.77	60	9.46296	9.64539
256	21	36	10.1538	8.81915
280	40	76	10.2016	9.0101
287	10	63	10.6506	9.95082
309	24	74	10.0787	9.40957
310	2	26	11.4074	9.63793
318	8	82	9.6	9.34328
320	56	84	9.81287	8.68056
321	10	48	9.4186	8.5514
335	68	86	10.0449	9.5311
336	0	18	n/a	9.59649
338	26	44	9.78788	9.16346
340	43	57	10.3571	9.76687
348	6	8	9.46237	8.50685
350	10	50	9.775	9.07843
352	46	70	9.65169	8.97006
354	15	27	9.57353	8.84404
355	16	58	9.72464	9.33516
356	5	60	9.42308	9.59859
359	0	67	10.2	9.81771
361	8	52.59	10.0278	10.5714
367	20	76	10.3295	9.64516
370	10	51.13	9.43243	8.74857
371	27	74	9.78505	9.74869
373	16	36	10.1566	9.66387
374	41	54	9.56637	9.20144
380	40	86	10.725	9.69444
381	8	32	10	9.11607
382	12	25	10.2987	10.1649
383	1	72	10.3846	9.10615
385	34	66	10.0891	9.46622
386	18	40	9.78049	9.625
390	16	22	10.1587	8.90625
392	50	82	10.0156	9.55665
395	50	66	10.4453	9.03509
397	24	34	10.3194	9.57391
405	64	62	9.87425	9.66883
406	56	52	10.75	9.81618
409	6	28	9.92	8.53435
426	12	40	9.51064	8.4188
439	32	70	9.86486	9.36634
440	70	76	10.6774	9.55959
441	16	44	9.87037	9.39496
443	34	46	9.31884	8.925
461	10	42	9.95775	10.3279
491	1	52	10.2031	9.11465
492	28	88	11.3175	9.26364
502	52	64	9.81301	9.5
505	36	47	10	8.64804
508	10	22	9.44186	8.26829
509	0	44	8.125	9.22754
513	8	34	10.7895	10.0448
528	19	36	9.83607	8.92308
530	67	67	10.4686	9.94527
531	4	35	9.9375	9.17582
535	18	84	9.56842	9
551	2	76	10.2727	9.16837
559	2	32	9.19444	8.15842
563	0	18	10.2941	10.5333
566	48	61	9.45455	8.52841
584	0	78	9.05263	8.39247
589	32	67	10.7222	9.43878
595	44	62	9.69106	9.53205
596	18	39	10.9592	9.23478
627	2	66	9.15068	8.72822
630	26	68	9.67816	9.08861
634	4	15	9.61538	8.82222
642	2	19	9.91667	9.64706
646	0	28	11.3333	9.21127
703	10	62	9.8172	9.81507
716	15	44	10.25	9.57143
721	0	70	n/a	8.88439
727	22	70	9.86	9.32353
737	8	78	9.84615	9.60606
738	5.28	30	9.03333	8.61856
748	24	62	9.7561	8.78095
757	8	18	9.15789	9.32394
761	6	48	11	9.47518
776	5	72	9.10345	8.87619
783	37	80	9.65789	9.705
787	43	78	9.30894	8.80311
790	10	65	9.98529	8.56995
796	66	84	10.0762	9.51323
801	0	70	8.95652	9.16477
802	12	62	9.58696	8.92414
804	4	57	10.1333	9.09412
805	49	60	10.0814	9.36723
808	74	82	10.4167	9.27273
810	22	65	9.90984	8.63861
812	8	50	9.92857	9.21374
818	0	16	9.33333	9.66667
819	31	56	9.84375	9.00474
821	16	56	9.63704	9.2454
822	12	68	9.2766	9.44848
832	4	73	10	9.74537
837	6	46	10.2679	9.29688
843	16	42	9.51786	8.61728
849	8	59	9.74	8.95775
850	6	20	10.9259	10.6667
853	16	62	9.53571	9.61236
855	6	60	10.4222	9.22267
857	18	34	9.58442	8.69919
861	9	50	11	10.25
879	6	40	9.94872	8.5283
882	1	38	10.4167	9.7625
884	6	54	9.60215	9.18841
887	0	19	10.6667	9.89583
890	26	72	10.1757	9.26776
892	2	12	9.57143	8.61194
894	24	62	9.54369	8.77612
897	29	58	10.507	9.79355
900	4	62	10.1	9.71429
907	26	86	11.2812	10.4717
908	14	64	9.74419	9.62609
911	46	74	11.1739	11.3297
913	36	74	9.44086	9.41477
* yellow color indicated lines that did not survived on ethanol-supplemented media (ETOH).
